# Supplementary material
Source: Springer Nature journal article supplement (https://www.springermedizin.de/resource/supplementary/12990_2009_222_MOESM5_ESM.pdf/9612822)

**A****Antisense****PERI(R)/IB4(G)****Merged****Contralateral**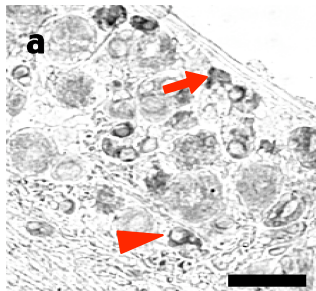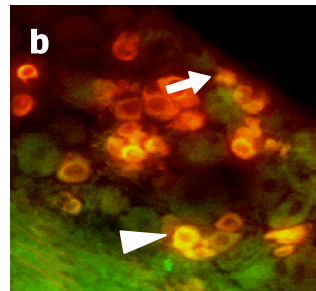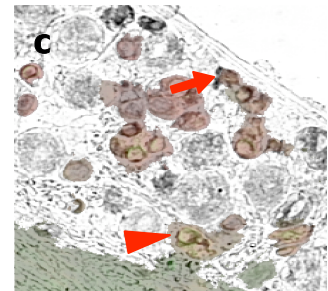**Ipsilateral**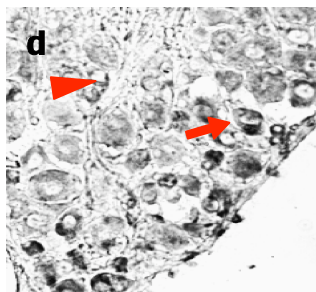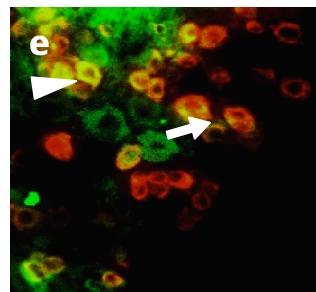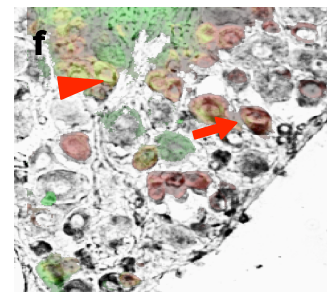**B**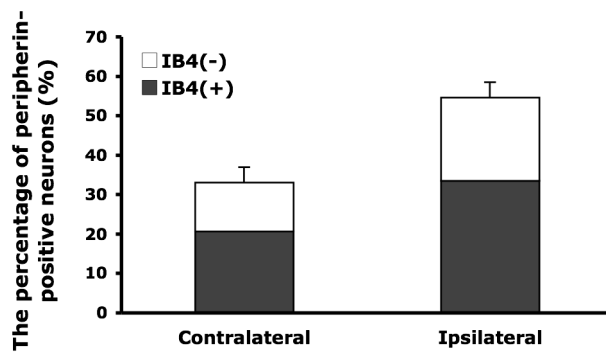

Supplement: MOESM5 [file 9612822]
